# Supplementary material
Source: HighWire-hosted journal article supplement (https://jnm.snmjournals.org/highwire/filestream/94198/field_highwire_adjunct_files/0/85589_Supplemental_Data.pdf)
Supplement: 85589_Supplemental_Data.pdf [file 85589_Supplemental_Data.pdf]

1. Which best describes your professional Training? (multiple options possible)
  - Nuclear Medicine Physician
  - Nuclear Medicine Technologist
  - Nuclear Medicine Scientist or Researcher
  - Nuclear Medicine Chemist/Pharmacist
  - Nuclear Medicine Physicist
  - Radiologist
  - Nuclear Medicine Resident or Fellow
  - Other
  
2. Which of the following best describes your practice?
  - Private Practice, mainly outpatient
  - University Hospital
  - Non University Hospital
  - Private Multispecialty Office
  - Industry
  - Other
  
3. Do you treat patients with lymphoma with Bexxar or Zevalin Radioimmunotherapy?
  - No
  - Yes, 1 - 3 in the last 24 months
  - Yes, 4 - 7 in the last 24 months
  - Yes, 8 - 15 in the last 24 months
  - Yes, > 15 in the last 24 months
  
4. Which Radioimmunotherapy Agent for Non Hodgkins Lymphoma do you use?
  - Bexxar
  - Zevalin
  - Both
  - Neither
  
5. Who refers patients with Non-Hodgkins Lymphoma to you for Bexxar or Zevalin? (multiple options possible)
  - Physicians from University Hospitals
  - Physicians from non University Hospitals
  - Physicians from multispecialty offices
  - Physicians from private offices
  - Patients do refer themselves
  - No one in the past 24 months
  
6. Lymphoma treatment with Bexxar or Zevalin: When should it be used? (multiple options possible)
  - 1st line treatment for Non Hodgkins Lymphoma
  - 2nd line treatment for Non Hodgkins Lymphoma
  - 3rd line treatment for Non Hodgkins Lymphoma
  - Later than 3rd line treatment for Non Hodgkins Lymphoma
  - Consolidation after chemoimmunotherapy in Non Hodgkins Lymphoma
  - Only investigational for Non Hodgkins Lymphoma
  - Never
  - In Follicular or Secondary Transformed Non Hodgkins Lymphoma
  - In all CD20 positive Non Hodgkins Lymphoma
  - Other

7. If you treat with Bexxar or Zevalin: Do you treat in an inpatient or outpatient setting?

- Inpatient
- Outpatient
- Both

8. Do you treat thyroid diseases with radioactive iodine?

- Yes
- No

9. Do Radiation Oncologists treat with unsealed sources at your institution?

- Yes
- No
- Don't know

10. Does your Institution accept Medicare patients for treatment with Bexxar or Zevalin?

- Yes
- No
- Don't know

11. Non Hodgkins Lymphoma treatment with Bexxar or Zevalin: What are your concerns?

|                                                                                                                | 1 (no concern)        | 1                     | 2                     | 3                     | 4 (major concern)     |
|----------------------------------------------------------------------------------------------------------------|-----------------------|-----------------------|-----------------------|-----------------------|-----------------------|
| Zevalin or Bexxar therapy provides poor payment for the time and effort in the administration process          | <input type="radio"/> |
| Zevalin or Bexxar therapy provides poor payment for the time and effort in the radiolabelling process          | <input type="radio"/> |
| Bexxar or Zevalin take too much time from my practice in general                                               | <input type="radio"/> |
| We have concerns about the Radiation Safety                                                                    | <input type="radio"/> |
| We have concerns about the Dosimetry Procedure                                                                 | <input type="radio"/> |
| Bexxar administration is too complicated in general                                                            | <input type="radio"/> |
| Zevalin administration is too complicated in general                                                           | <input type="radio"/> |
| Most Nuclear Physicians are not trained to administer potential myeloablative therapies like Zevalin or Bexxar | <input type="radio"/> |
| Oncologists/Hematologists prefer to treat by themselves with non-radioactive compounds                         | <input type="radio"/> |
| Bexxar or Zevalin Treatment is too expensive                                                                   | <input type="radio"/> |
| Bexxar or Zevalin Treatment does not have enough reported randomized studies                                   | <input type="radio"/> |
| There might be unexpected late side effects of Bexxar or Zevalin (MDS)                                         | <input type="radio"/> |
| Concerns exist that subsequent treatments will not be possible after Bexxar or Zevalin                         | <input type="radio"/> |

12. Do you believe Radioimmunotherapy for the Treatment of Non-Hodgkins Lymphoma will grow in importance?

- It will grow in importance
- It will probably grow in importance
- uncertain
- It will probably NOT grow in importance
- It will NOT grow in importance

13. Do you have any further concerns or comments pertaining to Non Hodgkins Lymphoma Treatment with Bexxar or Zevalin?

---

---

---

---

---
